# Supplementary material
Source: Springer Nature journal article supplement (https://www.springermedizin.de/resource/supplementary/12943_2010_801_MOESM8_ESM.pdf/9554864)

A

EBC1-V1

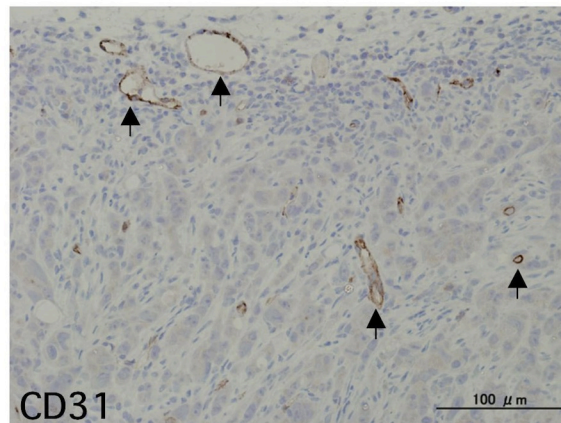

EBC1-P4

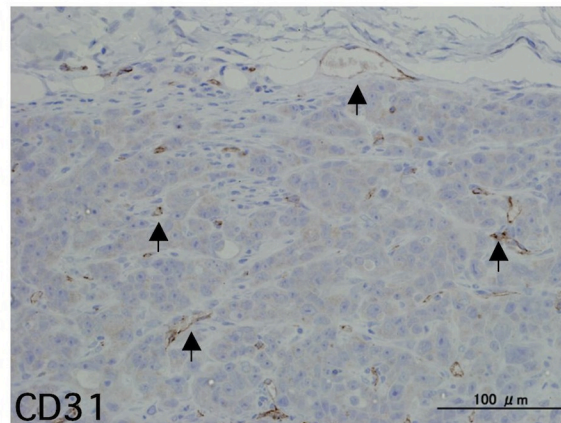

B

### CD31 positive vessels

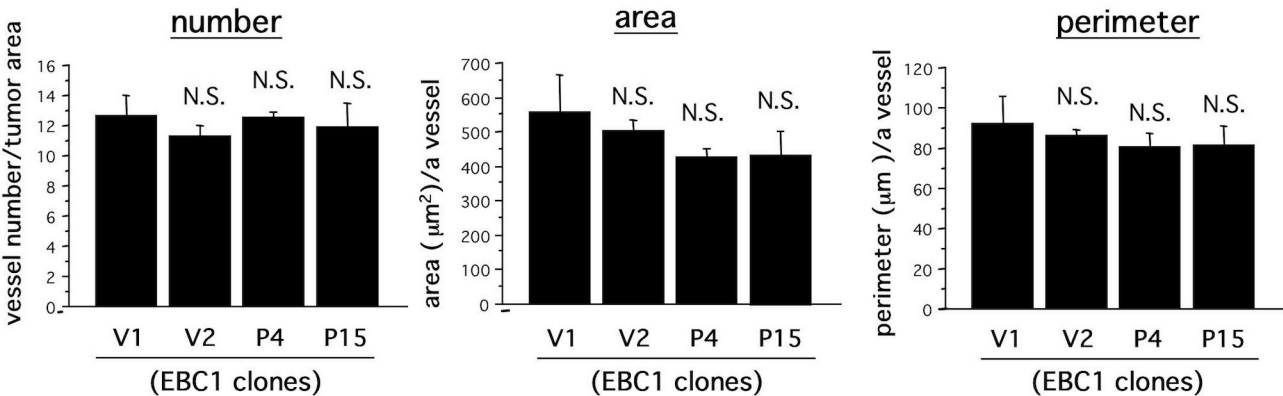

Supplement: MOESM8 [file 9554864]
